# Supplementary material for: RNA-dependent regulation of the cell wall stress response
Source: PubMed Central journal article supplement — Nucleic Acids Res. 2012 May 10;40(15):7507–17. doi: 10.1093/nar/gks411 (PMC3424562; doi:10.1093/nar/gks411), 2012-05-10
Supplement: supp_gks411_nar-00172-v-2012-File008.pdf [file supp_gks411_nar-00172-v-2012-File008.pdf]

Table S1. Strains used in this study.

| Strains                                   | Genotype                                                                                                                                                                                                                | Source                 |
|-------------------------------------------|-------------------------------------------------------------------------------------------------------------------------------------------------------------------------------------------------------------------------|------------------------|
| LLY36                                     | <i>MATa</i> $\alpha$ <i>lys2</i> $\Delta$ 0/ <i>lys2</i> $\Delta$ 0 <i>ura3</i> $\Delta$ 0/ <i>ura3</i> $\Delta$ 0 <i>his3</i> $\Delta$ 200/ <i>his3</i> $\Delta$ 200<br><i>leu2</i> $\Delta$ 0/ <i>leu2</i> $\Delta$ 0 | Personal communication |
| <i>RNT1</i>                               | <i>MATa lys2</i> $\Delta$ 0 <i>ura3</i> $\Delta$ 0 <i>his3</i> $\Delta$ 200 <i>leu2</i> $\Delta$ 0                                                                                                                      | This study             |
| <i>rnt1</i> $\Delta$                      | <i>MATa lys2</i> $\Delta$ 0 <i>ura3</i> $\Delta$ 0 <i>his3</i> $\Delta$ 200 <i>leu2</i> $\Delta$ 0 <i>rnt1</i> $\Delta$ :: <i>HIS3</i>                                                                                  | This study             |
| <i>HSL1-GFP</i>                           | <i>MATa his3</i> $\Delta$ 1 <i>leu2</i> $\Delta$ 0 <i>met15</i> $\Delta$ 0 <i>ura3</i> $\Delta$ 0 <i>HSL1-GFP</i> :: <i>HIS3MX6</i>                                                                                     | Invitrogen             |
| <i>HSL1-GFP rnt1</i> $\Delta$             | <i>MATa his3</i> $\Delta$ 1 <i>leu2</i> $\Delta$ 0 <i>met15</i> $\Delta$ 0 <i>ura3</i> $\Delta$ 0 <i>HSL1-GFP</i> :: <i>HIS3MX6</i><br><i>rnt1</i> $\Delta$ :: <i>KanMX</i>                                             | This study             |
| <i>SWI4-GFP</i>                           | <i>MATa his3</i> $\Delta$ 1 <i>leu2</i> $\Delta$ 0 <i>met15</i> $\Delta$ 0 <i>ura3</i> $\Delta$ 0 <i>SWI4-GFP</i> :: <i>HIS3MX6</i>                                                                                     | Invitrogen             |
| <i>SWI4-GFP rnt1</i> $\Delta$             | <i>MATa his3</i> $\Delta$ 1 <i>leu2</i> $\Delta$ 0 <i>met15</i> $\Delta$ 0 <i>ura3</i> $\Delta$ 0 <i>SWI4-GFP</i> :: <i>HIS3MX6</i><br><i>rnt1</i> $\Delta$ :: <i>KanMX</i>                                             | This study             |
| <i>RNT1-GFP</i>                           | <i>MATa his3</i> $\Delta$ 1 <i>leu2</i> $\Delta$ 0 <i>met15</i> $\Delta$ 0 <i>ura3</i> $\Delta$ 0 <i>RNT1-GFP</i> :: <i>HIS3MX6</i>                                                                                     | Invitrogen             |
| <i>P<sub>Gal1</sub>-BEM2</i>              | <i>MATa lys2</i> $\Delta$ 0 <i>ura3</i> $\Delta$ 0 <i>his3</i> $\Delta$ 200 <i>leu2</i> $\Delta$ 0 [pBG1805-BEM2] <sup>a</sup>                                                                                          | This study             |
| <i>P<sub>Gal1</sub>-HSL1</i>              | <i>MATa lys2</i> $\Delta$ 0 <i>ura3</i> $\Delta$ 0 <i>his3</i> $\Delta$ 200 <i>leu2</i> $\Delta$ 0 [pEGH-HSL1] <sup>a</sup>                                                                                             | This study             |
| <i>P<sub>Gal1</sub>-RLM1</i>              | <i>MATa lys2</i> $\Delta$ 0 <i>ura3</i> $\Delta$ 0 <i>his3</i> $\Delta$ 200 <i>leu2</i> $\Delta$ 0 [pBG1805-RLM1] <sup>a</sup>                                                                                          | This study             |
| <i>P<sub>Gal1</sub>-SIC1</i>              | <i>MATa lys2</i> $\Delta$ 0 <i>ura3</i> $\Delta$ 0 <i>his3</i> $\Delta$ 200 <i>leu2</i> $\Delta$ 0 [pBG1805-SIC1] <sup>a</sup>                                                                                          | This study             |
| <i>P<sub>Gal1</sub>-SLT2</i>              | <i>MATa lys2</i> $\Delta$ 0 <i>ura3</i> $\Delta$ 0 <i>his3</i> $\Delta$ 200 <i>leu2</i> $\Delta$ 0 [pBG1805-SLT2] <sup>a</sup>                                                                                          | This study             |
| <i>P<sub>Gal1</sub>-SWI4</i>              | <i>MATa lys2</i> $\Delta$ 0 <i>ura3</i> $\Delta$ 0 <i>his3</i> $\Delta$ 200 <i>leu2</i> $\Delta$ 0 [pEGH-SWI4] <sup>a</sup>                                                                                             | This study             |
| <i>bar1</i> $\Delta$                      | <i>MATa lys2</i> $\Delta$ 0 <i>ura3</i> $\Delta$ 0 <i>his3</i> $\Delta$ 200 <i>leu2</i> $\Delta$ 0 <i>bar1</i> $\Delta$ :: <i>KANMX</i>                                                                                 | This study             |
| <i>bar1</i> $\Delta$ <i>rnt1</i> $\Delta$ | <i>MATa lys2</i> $\Delta$ 0 <i>ura3</i> $\Delta$ 0 <i>his3</i> $\Delta$ 200 <i>leu2</i> $\Delta$ 0 <i>bar1</i> $\Delta$ :: <i>KANMX</i><br><i>rnt1</i> $\Delta$ :: <i>HIS3</i>                                          | This study             |
| <i>bck1</i> $\Delta$                      | <i>MATa lys2</i> $\Delta$ 0 <i>ura3</i> $\Delta$ 0 <i>his3</i> $\Delta$ 200 <i>leu2</i> $\Delta$ 0 <i>bck1</i> $\Delta$ :: <i>KANMX</i>                                                                                 | This study             |
| <i>bck1</i> $\Delta$ <i>rnt1</i> $\Delta$ | <i>MATa lys2</i> $\Delta$ 0 <i>ura3</i> $\Delta$ 0 <i>his3</i> $\Delta$ 200 <i>leu2</i> $\Delta$ 0 <i>bck1</i> $\Delta$ :: <i>KANMX</i><br><i>rnt1</i> $\Delta$ :: <i>HIS3</i>                                          | This study             |
| <i>hog1</i> $\Delta$                      | <i>MATa lys2</i> $\Delta$ 0 <i>ura3</i> $\Delta$ 0 <i>his3</i> $\Delta$ 200 <i>leu2</i> $\Delta$ 0 <i>hog1</i> $\Delta$ :: <i>KANMX</i>                                                                                 | This study             |
| <i>hog1</i> $\Delta$ <i>rnt1</i> $\Delta$ | <i>MATa lys2</i> $\Delta$ 0 <i>ura3</i> $\Delta$ 0 <i>his3</i> $\Delta$ 200 <i>leu2</i> $\Delta$ 0 <i>hog1</i> $\Delta$ :: <i>KANMX</i><br><i>rnt1</i> $\Delta$ :: <i>HIS3</i>                                          | This study             |
| <i>hsl1</i> $\Delta$                      | <i>MATa lys2</i> $\Delta$ 0 <i>ura3</i> $\Delta$ 0 <i>his3</i> $\Delta$ 200 <i>leu2</i> $\Delta$ 0 <i>hsl1</i> $\Delta$ :: <i>KANMX</i>                                                                                 | This study             |
| <i>hsl1</i> $\Delta$ <i>rnt1</i> $\Delta$ | <i>MATa lys2</i> $\Delta$ 0 <i>ura3</i> $\Delta$ 0 <i>his3</i> $\Delta$ 200 <i>leu2</i> $\Delta$ 0 <i>hsl1</i> $\Delta$ :: <i>KANMX</i><br><i>rnt1</i> $\Delta$ :: <i>HIS3</i>                                          | This study             |
| <i>mkk1</i> $\Delta$                      | <i>MATa lys2</i> $\Delta$ 0 <i>ura3</i> $\Delta$ 0 <i>his3</i> $\Delta$ 200 <i>leu2</i> $\Delta$ 0 <i>mkk1</i> $\Delta$ :: <i>KANMX</i>                                                                                 | This study             |
| <i>mkk1</i> $\Delta$ <i>rnt1</i> $\Delta$ | <i>MATa lys2</i> $\Delta$ 0 <i>ura3</i> $\Delta$ 0 <i>his3</i> $\Delta$ 200 <i>leu2</i> $\Delta$ 0 <i>mkk1</i> $\Delta$ :: <i>KANMX</i><br><i>rnt1</i> $\Delta$ :: <i>HIS3</i>                                          | This study             |
| <i>mkk2</i> $\Delta$                      | <i>MATa lys2</i> $\Delta$ 0 <i>ura3</i> $\Delta$ 0 <i>his3</i> $\Delta$ 200 <i>leu2</i> $\Delta$ 0 <i>mkk2</i> $\Delta$ :: <i>KANMX</i>                                                                                 | This study             |
| <i>mkk2</i> $\Delta$ <i>rnt1</i> $\Delta$ | <i>MATa lys2</i> $\Delta$ 0 <i>ura3</i> $\Delta$ 0 <i>his3</i> $\Delta$ 200 <i>leu2</i> $\Delta$ 0 <i>mkk2</i> $\Delta$ :: <i>KANMX</i><br><i>rnt1</i> $\Delta$ :: <i>HIS3</i>                                          | This study             |
| <i>rlm1</i> $\Delta$                      | <i>MATa lys2</i> $\Delta$ 0 <i>ura3</i> $\Delta$ 0 <i>his3</i> $\Delta$ 200 <i>leu2</i> $\Delta$ 0 <i>rlm1</i> $\Delta$ :: <i>KANMX</i>                                                                                 | This study             |
| <i>rlm1</i> $\Delta$ <i>rnt1</i> $\Delta$ | <i>MATa lys2</i> $\Delta$ 0 <i>ura3</i> $\Delta$ 0 <i>his3</i> $\Delta$ 200 <i>leu2</i> $\Delta$ 0 <i>rlm1</i> $\Delta$ :: <i>KANMX</i><br><i>rnt1</i> $\Delta$ :: <i>HIS3</i>                                          | This study             |
| <i>slt2</i> $\Delta$                      | <i>MATa lys2</i> $\Delta$ 0 <i>ura3</i> $\Delta$ 0 <i>his3</i> $\Delta$ 200 <i>leu2</i> $\Delta$ 0 <i>slt2</i> $\Delta$ :: <i>KANMX</i>                                                                                 | This study             |
| <i>slt2</i> $\Delta$ <i>rnt1</i> $\Delta$ | <i>MATa lys2</i> $\Delta$ 0 <i>ura3</i> $\Delta$ 0 <i>his3</i> $\Delta$ 200 <i>leu2</i> $\Delta$ 0 <i>slt2</i> $\Delta$ :: <i>KANMX</i><br><i>rnt1</i> $\Delta$ :: <i>HIS3</i>                                          | This study             |

|                     |                                                                              |                 |
|---------------------|------------------------------------------------------------------------------|-----------------|
| <i>swi4Δ</i>        | <i>MATa lys2Δ0 ura3Δ0 his3Δ200 leu2Δ0 swi4Δ::KANMX</i>                       | This study      |
| <i>swi4Δ rnt1Δ</i>  | <i>MATa lys2Δ0 ura3Δ0 his3Δ200 leu2Δ0 swi4Δ::KANMX</i><br><i>rnt1Δ::HIS3</i> | This study      |
| GFP                 | <i>rnt1Δ [pRS315/GFP]<sup>b</sup></i>                                        | This study      |
| GFP-RNT1            | <i>rnt1Δ [pRS315/GFP/RNT1]<sup>b</sup></i>                                   | This study      |
| GFP-rnt1-D247R      | <i>rnt1Δ [pRS315/GFP/rnt1-D247/R]<sup>b</sup></i>                            | This study      |
| <i>rnt1-ts</i>      | <i>rnt1Δ [pRS315/rnt1-I338/T]<sup>b</sup></i>                                | This study      |
| <i>rat1-1 xrn1Δ</i> | <i>MATa ade3 his3 leu2 trp1 xrn1Δ::URA3 rat1-1</i>                           | (58)            |
| <i>xrn1Δ</i>        | <i>MATa ura3Δ0 his3Δ1 leu2Δ0 met15Δ0 xrn1Δ::KANMX</i>                        | Open Biosystems |

<sup>a</sup> Plasmids bought from Open Biosystems and transformed into the *RNT1* strain.

<sup>b</sup> Plasmids described previously in (57) and transformed into *rnt1Δ* strain.

Table S2. Primers used in this study.

| Primers     | Sequences                                                                    |
|-------------|------------------------------------------------------------------------------|
| RNT1del For | 5'-GCGCATATAGAAGAGAGCAAACTGTCCTATTTACAAGCT<br>TTTCAAACAAGATTGTA CTGAGAGTGCAC |
| RNT1del Rev | 5'-GCTAAAGAAAATCAATGCAAGTTCCATCATGGTTGTGTAA<br>AAGGAACGTTCTGTGCGGTATTTACACCG |
| HSL1 For 3' | 5'-TATCCGAGGAATCTTCTCAA                                                      |
| HSL1 Rev 3' | 5'-CGCTTCTTCAACTTCAACAT                                                      |
| SWI4 For 3' | 5'-TTGGAATCGCCTTCTTCCCTTC                                                    |
| SWI4 Rev 3' | 5'-GGTTGTGTCGACTTATGCGTTTGCCCTCAAATCC                                        |
| ACT1 For    | 5'-ATGTTTAGAGGTTGCTGCTT                                                      |
| ACT1 Rev    | 5'-AGAGAGAAACCAGCGTAAAT                                                      |
| APC4 For 3' | 5'-AAAGGAATCGTCAGTCAAGA                                                      |
| APC4 Rev 3' | 5'-CCCTGATGTAAGCAGGAATA                                                      |
| HSL1 pe     | 5'-ATCTCTTCAGTAGTCTCTCTGG                                                    |
| SWI4 pe     | 5'-TAGATTGATTCAGCTTTTTCTCC                                                   |
| RNT1-RT For | 5'-TTAAGAAAGCTTGCCAAACCTGTCATTGAGG                                           |
| RNT1-RT Rev | 5'-CAACTATGGAATTAGGATCAACTGCAGTGGG                                           |
| ACT1-RT For | 5'-CAATGGATTCTGAGGTTGCTGCTTTG                                                |
| ACT1-RT Rev | 5'-CTTGGTCTACCGACGATAGATGGG                                                  |
| snR68-A-For | 5'-AACTTGATGCTTCGATGGGG                                                      |
| snR68-A-Rev | 5'-AAGTCGCGCCTGTATCCTTA                                                      |
| HSL1-RT-For | 5'-TATCCGAGGAATCTTCTCAACTTGTGTTGC                                            |
| HSL1-RT-Rev | 5'-GTATGGGTTTGTGTATTTGATTCCATAGCGG                                           |
| SWI4-RT-For | 5'-CTGGCTACAATTGTCCAGGATGAGGAATC                                             |
| SWI4-RT-Rev | 5'-CAGTATTAGAAAATTTGGCGTCCGCTTTGG                                            |

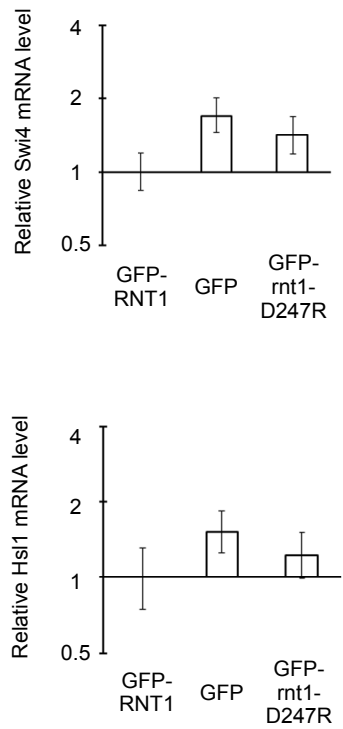

**Figure S1.** The loss of catalytic activity of Rnt1p causes the *in vivo* accumulation of Swi4 and Hsl1 mRNAs. RT-qPCR quantification of Swi4 and Hsl1 mRNAs from *rnt1* $\Delta$  cells expressing an empty vector (GFP) or a catalytic mutant of Rnt1p (GFP-*rnt1*-D247R) compared to GFP-RNT1 and normalized to Act1 mRNA.

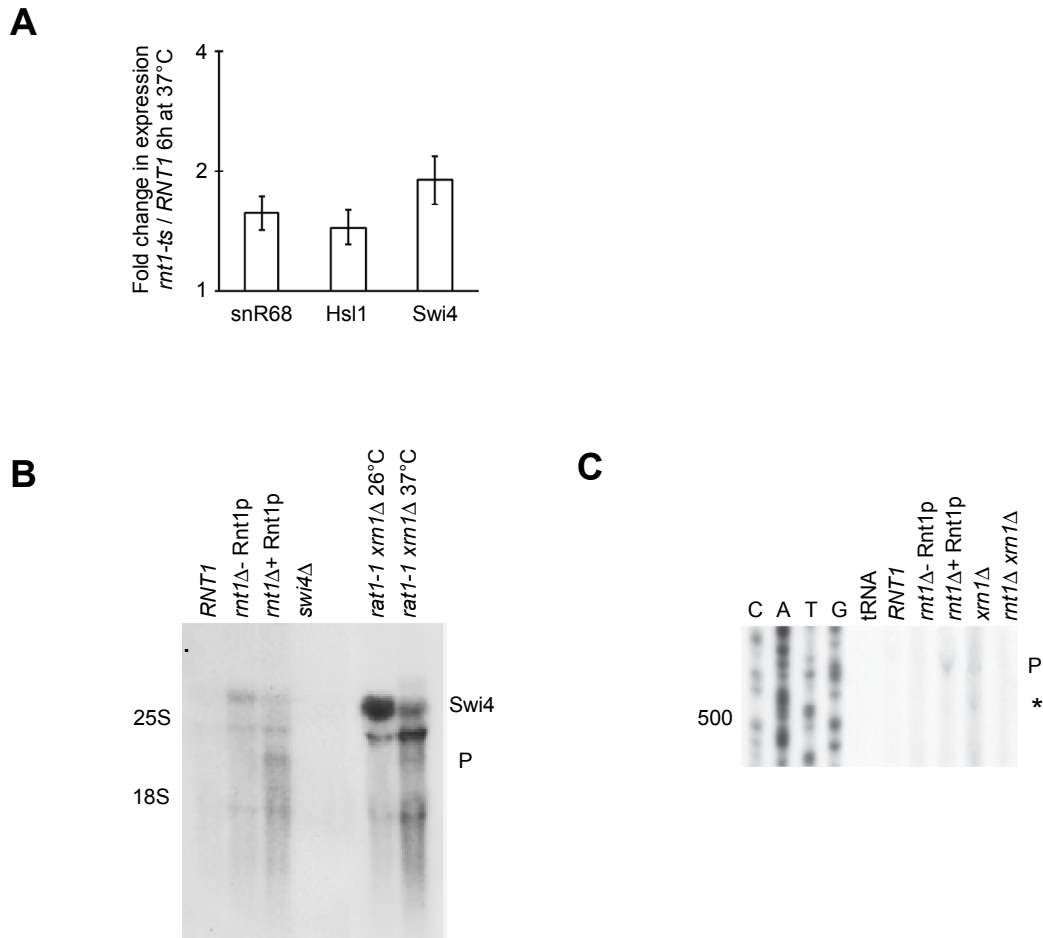

**Figure S2.** (A) The inactivation of a thermosensitive allele of *RNT1* causes the accumulation of Rnt1p substrates. Cells expressing *RNT1* or a thermosensitive allele of *RNT1* (*mt1-ts*) were shifted from 26°C to 37°C for the indicated time. The relative levels of the known substrate snR68 (5' extension) and the mRNAs of Hsl1 and Swi4 in *RNT1* and *mt1-ts* were quantified by qRT-PCR with respect to Act1 mRNA level and normalized to the expression before shift. The inactivation of 5'-3' exoribonucleases stabilizes Rnt1p's cleavage products. (B) Northern blot analysis of Swi4 mRNA from *rat1-1 xrn1Δ* cells grown at the permissive (26°C) or restrictive (37°C) temperature compared to Rnt1p total RNA *in vitro* cleavage reaction. Rnt1p cleavage product is labeled P. (C) Primer extension analysis of Hsl1 mRNA from *xrn1Δ* cells compared to Rnt1p total RNA *in vitro* cleavage reaction. The sequencing reaction of plasmid M13mp18 with Universal primer was loaded as a molecular weight marker. Sequencing reaction lanes and primer extension lanes from the gels are displayed at different contrast adjustments. The *in vitro* cleavage product of Rnt1p is labeled P. Asterisks denote RNA 5' ends that accumulate *in vivo* in *xrn1Δ* cells.

**A**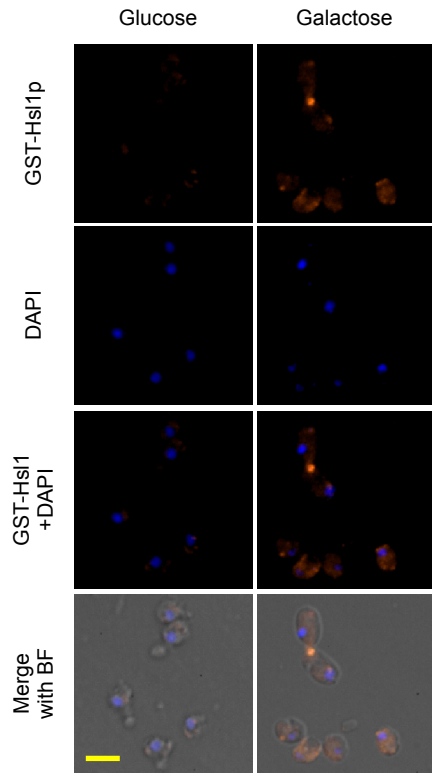**B**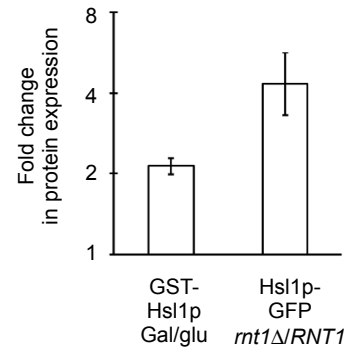**C**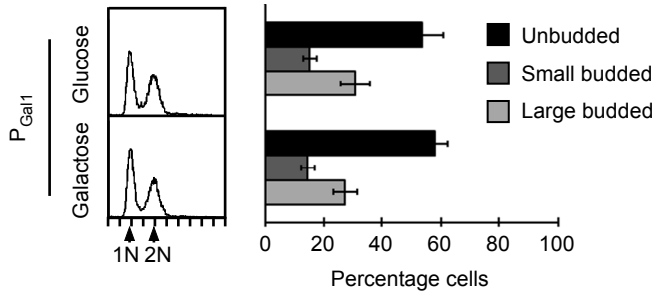**D**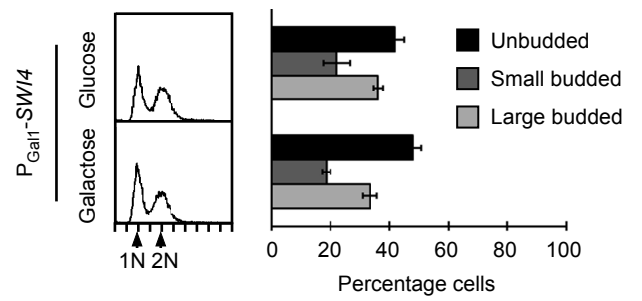**E**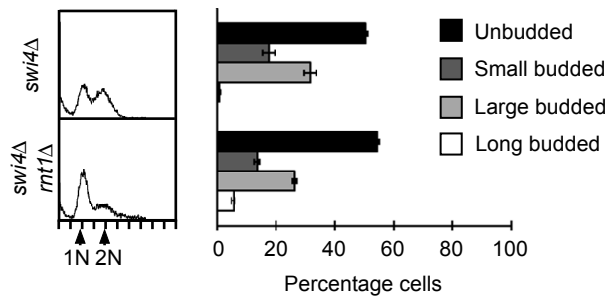

**Figure S3.** (A) Hsl1p expressed from the Gal promoter was observed by immunofluorescence using antibodies against a GST tag fused in N-terminal in cells grown in glucose or after induction for 6 hours in galactose. The scale bar represents 5  $\mu\text{m}$ . (B) The signal above background was measured by immunofluorescence for cells treated as in (A) and compared to the change in expression of Hsl1p-GFP in absence of *RNT1* as described in Figure 2. (C) *RNT1* cells expressing an empty vector were grown in glucose or galactose for 6 hours and analyzed using flow cytometry or light microscopy. The left panel shows DNA content analysis by flow cytometry with 1N and 2N peaks indicated. The bar graph on the right shows the distribution of cells according to the bud size and morphology. The data presented is an average of three independent experiments with error bars corresponding to SD. (D) *RNT1* cells expressing *SWI4* under the control of an inducible galactose promoter were grown under repressive (glucose) or inducible conditions (2% galactose for 6 hours) and analyzed as in C. (E) The effect of the deletion of *SWI4* in presence or absence of *RNT1* was assessed as in C for cells grown in YEPD.

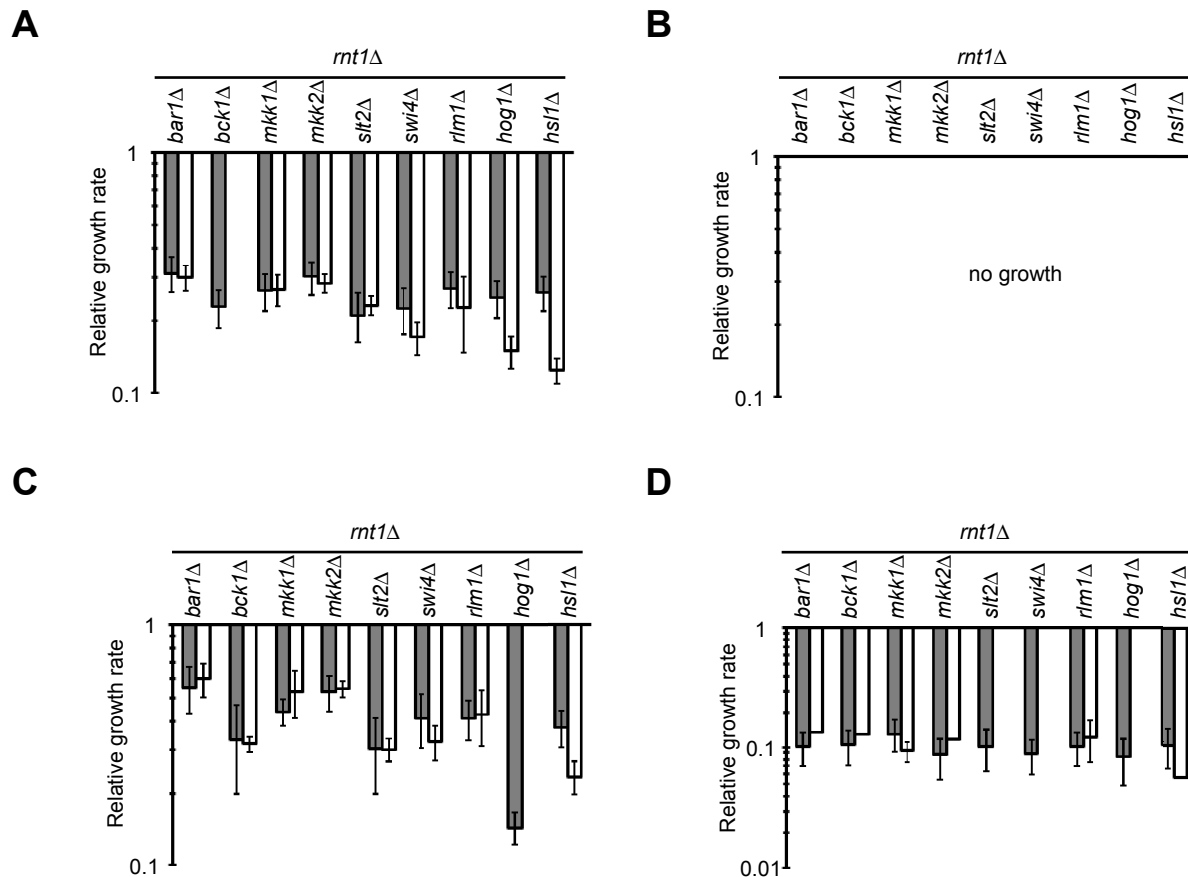

**Figure S4.** *RNT1* genetically interacts with cell wall stress response factors. *mt1Δ* cells carrying deletion in 8 genes implicated in hyper and hypo-osmotic stress response or an unrelated gene (*BAR1*) were generated and assayed for growth in liquid media containing or not 1 M sorbitol at 26 or 37°C. The relative growth rates of each single mutants and double mutants were calculated with respect to the wild-type for each growth condition. The expected relative growth rate of the double mutants calculated from the product of the relative growth rates of the two single mutants are reported in the gray bars. The white bars are the actual double mutants relative growth rates. (A) YEPD 26°C. (B) YEPD 37°C. (C) YEPD + 1 M sorbitol 26°C. (D) YEPD + 1 M sorbitol 37°C.



**A**

Effect of CWI genes overexpression on growth

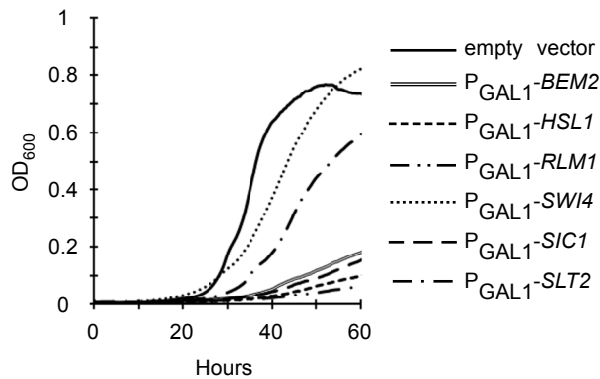**B**

Effect of CWI genes overexpression on growth rate

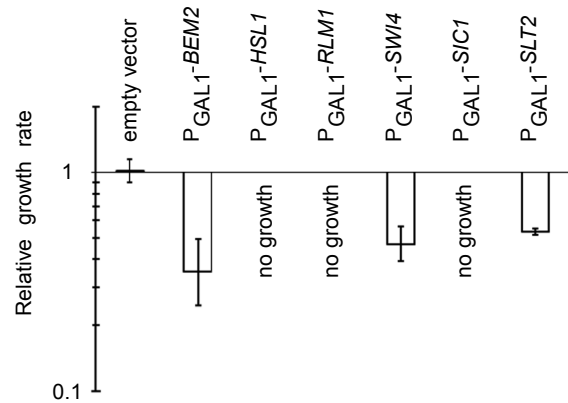**C**

Effect of CWI genes overexpression on stress sensitivity

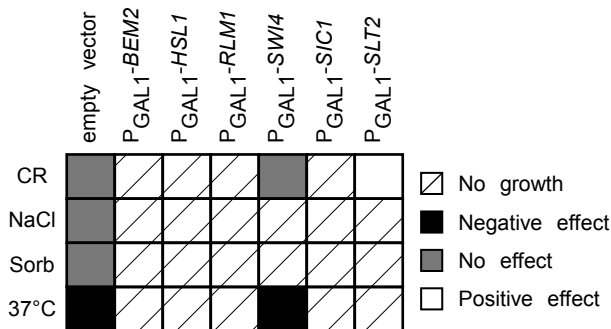

**Figure 5.** Overexpression of cell wall stress genes regulated by Rnt1p causes sensitivity to stress. Wild type cells transformed with plasmids expressing *BEM2*, *HSL1*, *RLM1*, *SWI4*, *SIC1* or *SLT2* under the control of a galactose inducible promoter were grown in synthetic media in presence of dextrose or galactose. (A) Growth curves under inducing conditions (galactose). (B) The effect of the overexpression on doubling time was calculated as relative growth rates for cells grown in galactose with respect to dextrose. Some growth rates that could not be calculated due to lack of growth in overexpression condition. (C) The effect of the overexpression of cell wall stress genes on stress response was assayed by comparing the growth in the presence of stress in inducing (galactose) and repressing (dextrose) conditions.

## SUPPLEMENTARY METHODS

### Immunofluorescence

GST-Hsl1p fusion protein was detected by immunofluorescence on yeast cells prepared as described in (20) using a rabbit anti-GST (Bethyl Laboratories, Montgomery, TX) at a dilution of 1:100 and a Texas-Red-X conjugated goat anti-rabbit antibody (Invitrogen Canada, Burlington, ON, Canada) at a dilution of 1:1000. Nuclei were stained with the DNA dye DAPI. Pictures were acquired on a Zeiss Axio Observer microscope (Carl Zeiss Canada) with a 100x/1.46 oil objective and analyzed using the Columbus software (Perkin Elmer) after image background correction.

## SUPPLEMENTARY REFERENCES

57. Catala, M., Tremblay, M., Samson, E., Conconi, A., and Abou Elela, S. (2008) Deletion of Rnt1p alters the proportion of open versus closed rRNA gene repeats in yeast. *Mol. Cell. Biol.*, **28**, 619-629.
58. Johnson, A. (1997) Rat1p and Xrn1p are functionally interchangeable exoribonucleases that are restricted to and required in the nucleus and cytoplasm, respectively. *Mol. Cell. Biol.*, **17**, 6122-6130.
